# Supplementary material
Source: PubMed Central journal article supplement (PMC3378123)
Supplement: emmm0001-0166-SD1.pdf [file emmm0001-0166-SD1.pdf]

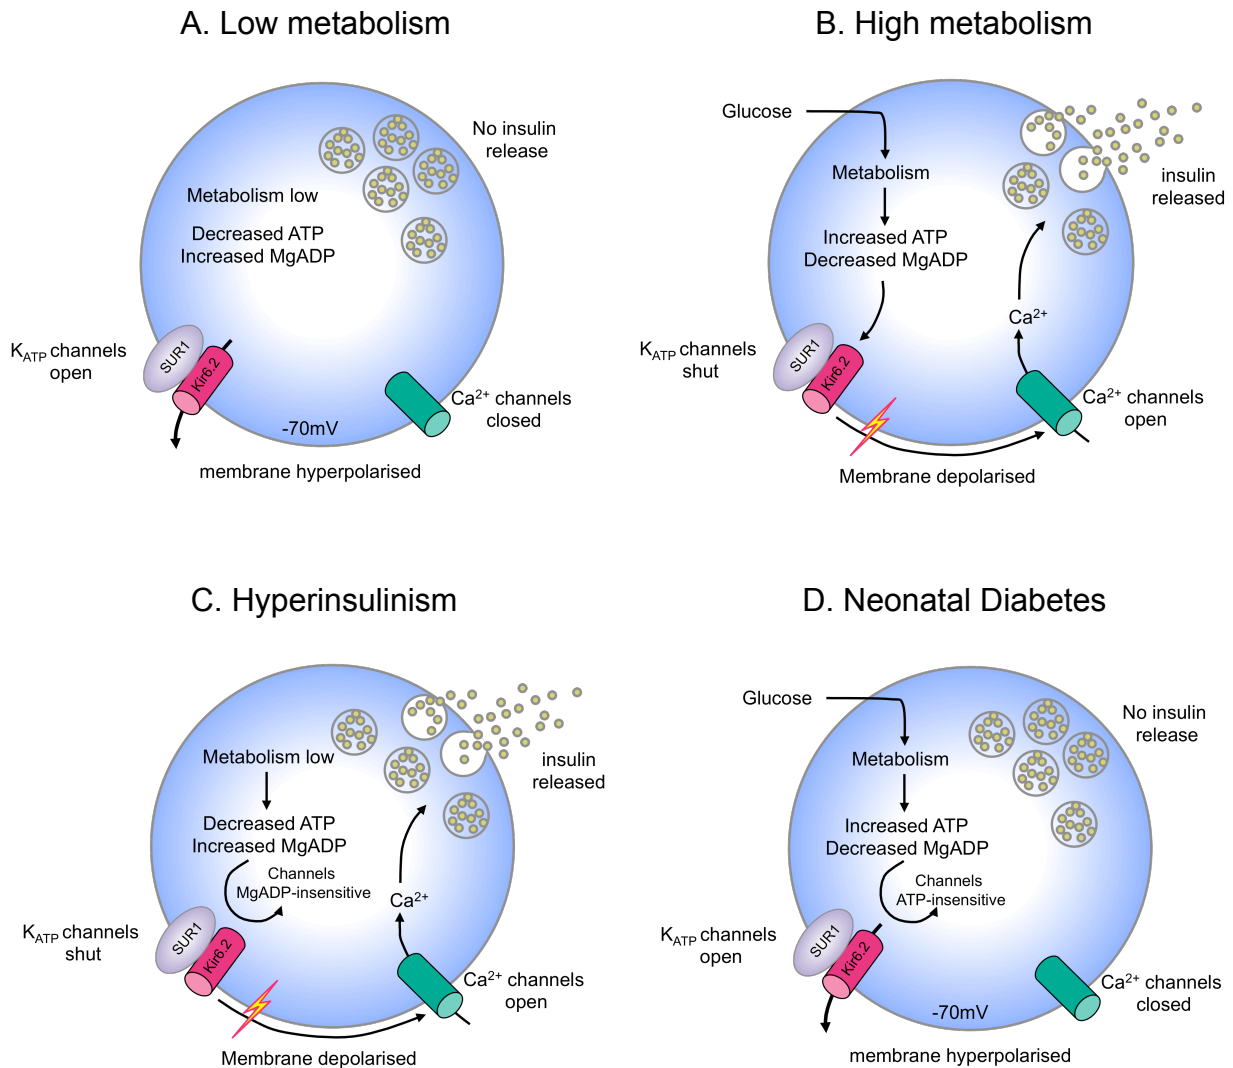

**Supplementary Figure 1** Stimulus-secretion coupling in pancreatic beta-cells.

(A) When extracellular glucose, and thus beta-cell metabolism, are low  $K_{ATP}$  channels are open. Consequently, the cell membrane is hyperpolarised. This keeps voltage-gated  $Ca^{2+}$  channels closed, so that  $Ca^{2+}$  influx remains low and insulin secretion is inhibited. (B) When extracellular glucose increases, glucose metabolism generates ATP at the expense of MgADP, thereby closing  $K_{ATP}$  channels. This leads to membrane depolarization, opening of voltage-gated  $Ca^{2+}$  channels,  $Ca^{2+}$  influx and insulin secretion. (C) Loss-of function mutations in  $K_{ATP}$  channel genes lead to a lack of  $K_{ATP}$  channel activity, either because of a reduced channel density or an inability to of the channel respond to the stimulatory effects of MgADP. Consequently, the membrane is permanently depolarised, causing continuous  $Ca^{2+}$  channel activity and  $Ca^{2+}$  influx. This produces persistent and unregulated insulin secretion. (D) Gain-of function mutations in  $K_{ATP}$  channel genes cause the channel to be open even when metabolism and cellular ATP levels are high. Consequently, the membrane remains hyperpolarised, preventing opening voltage-gated  $Ca^{2+}$  channels,  $Ca^{2+}$  influx and insulin secretion, even when blood glucose levels are high. This leads to diabetes.

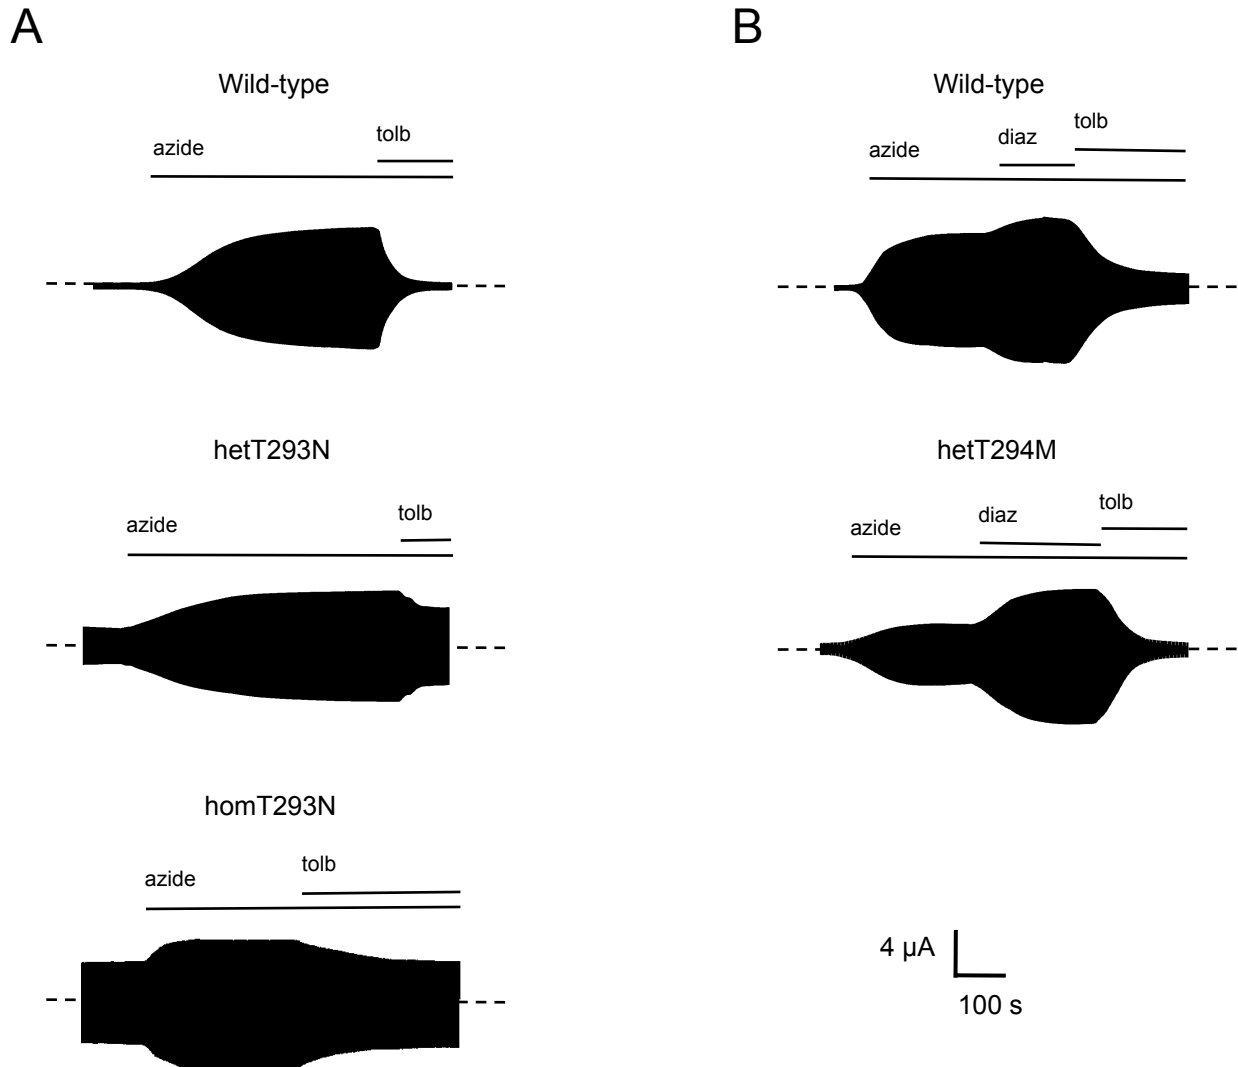

**Supplementary Figure 2**

(A) Representative wild-type, hetT293N and homT293M whole-cell currents evoked by a voltage step from -10mV to -30mV. The bars indicate the application of 3mM azide or 0.5mM tolbutamide (tolb). The dashed line indicates the zero current level.

(B) Representative wild-type and hetT294M whole-cell currents evoked by a voltage step from -10mV to -30mV. The bars indicate the application of 3mM azide, 340 $\mu$ M diazoxide or 0.5mM tolbutamide.

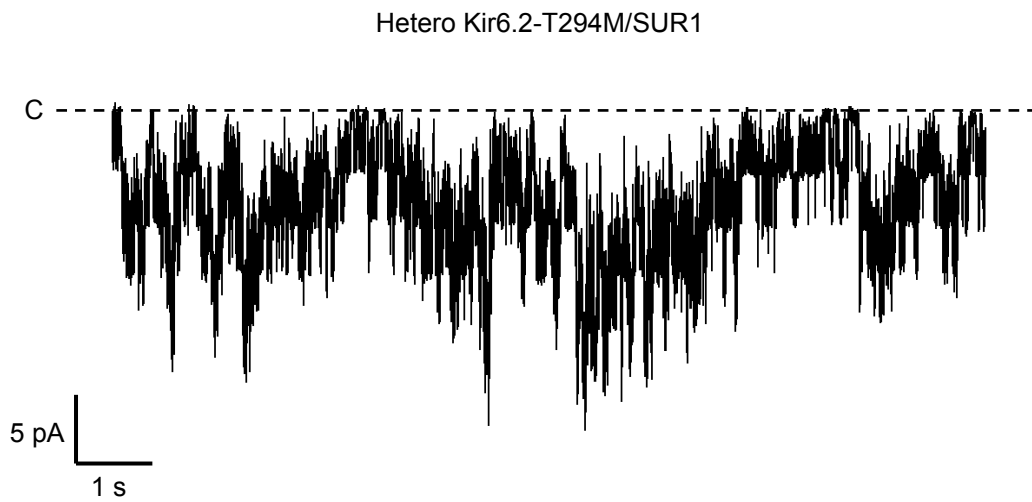

***Supplementary Figure 3***

Representative single  $K_{ATP}$  channel currents recorded at  $-60\text{mV}$  from inside-out patches from oocytes injected with SUR1 and a 1:1 ratio of Kir6.2 and Kir6.2-T294M to simulate the heterozygous state. The dashed line indicates the zero current level. C, closed state.
